1 **LETTER**

2  
3 **Rapid inactivation of SARS-CoV-2 with Deep-UV LED irradiation**

4  
5  
6 Hiroko Inagaki<sup>1</sup>, Akatsuki Saito<sup>2, 3</sup>, Hironobu Sugiyama<sup>1, 4</sup>, Tamaki Okabayashi<sup>2, 3</sup>, Shouichi  
7 Fujimoto<sup>5</sup>

- 8  
9 1. M&N Collaboration Research Laboratory, Department of Medical Environment Innovation,  
10 Faculty of Medicine, University of Miyazaki, Japan  
11 2. Department of Veterinary Science, Faculty of Agriculture, University of Miyazaki, Miyazaki,  
12 Japan  
13 3. Center for Animal Disease Control, University of Miyazaki, Miyazaki, Japan  
14 4. Nikkiso Co., LTD, Tokyo, Japan  
15 5. Department of Hemovascular Medicine and Artificial Organs, Faculty of Medicine, University  
16 of Miyazaki, Japan

17  
18  
19 **Corresponding author:**

20 Shouichi Fujimoto

21 Department of Hemovascular Medicine and Artificial Organs, Faculty of Medicine, University of  
22 Miyazaki, Japan, 5200 Kihara, Kiyotake, Miyazaki 889-1692, Japan

23 Tel: +81-985-85-9761

24 Fax: +81-985-85-9761

25 E-mail: fujimos@med.miyazaki-u.ac.jp

26  
27 **Keywords:**

28 COVID-19, Deep-UV LED, inactivation, SARS-CoV-2

29

30 **Abstract**

31 The spread of novel coronavirus disease 2019 (COVID-19) infections worldwide has raised  
32 concerns about the prevention and control of SARS-CoV-2. Devices that rapidly inactivate viruses  
33 can reduce the chance of infection through aerosols and contact transmission. This *in vitro* study  
34 demonstrated that irradiation with a deep ultraviolet light-emitting diode (DUV-LED) of  $280 \pm 5$  nm  
35 wavelength rapidly inactivates SARS-CoV-2 obtained from a COVID-19 patient. Development of  
36 devices equipped with DUV-LED is expected to prevent virus invasion through the air and after  
37 touching contaminated objects.

38

39 **Letter**

40 The novel coronavirus SARS-CoV-2 pandemic has spread worldwide and placed countries in  
41 emerging, rapidly transforming situations. The World Health Organization (WHO) clarified that  
42 more than 5.3 million cases of COVID-19 and 342,000 deaths had been reported to WHO by 25  
43 May 2020 [1]. Infectious virus is detected in specimens from the respiratory tract, nasopharyngeal  
44 sites, and feces in COVID-19 patients [2]. Recently, infectious SARS-CoV-2 was isolated from the  
45 urine of a COVID-19 patient [3]. SARS-CoV-2 is detectable in aerosols for up to 3 h, up to 4 h on  
46 copper, up to 24 h on cardboard and up to 2–3 days on plastic and stainless steel [4]. To prevent  
47 exposure to contaminated material (contact infection), which is one of the major transmission routes,  
48 hand hygiene with alcohol is recommended, but its effectiveness in preventing the spread of  
49 SARS-CoV-2 infection may be insufficient [5, 6].

50 A deep ultraviolet light-emitting diode (DUV-LED) instrument generating around 250–300 nm  
51 wavelength has been reported to effectively inactivate microorganisms, including bacteria, viruses  
52 and fungi [7–10], but effects on SARS-CoV-2 have not been reported. We evaluated the antiviral  
53 efficacy of irradiation by DUV-LED, generating the narrow-range wavelength ( $280 \pm 5$  nm) (Nikkiso  
54 Co., Tokyo, Japan), against SARS-CoV-2.

55 A strain of SARS-CoV-2 isolated from a patient who developed COVID-19 in the cruise ship  
56 *Diamond Princess* in Japan in February 2020 [11] was obtained from the Kanagawa Prefectural  
57 Institute of Public Health (SARS-CoV-2/Hu/DP/Kng/19-027, LC528233). The virus was propagated  
58 in Vero cells cultured in minimum essential medium (MEM) containing 2% fetal bovine serum  
59 (FBS). At 48 h after infection, virus stocks were collected by centrifuging the culture supernatants of  
60 infected Vero cells at 3,000 rpm for 10 min. Clarified supernatants were kept at  $-80$  °C until use.  
61 Aliquots of stock virus were diluted with phosphate-buffered saline and adjusted to  $2.0 \times 10^4$   
62 plaque-forming units (PFU)/ml. For the evaluation of DUV-LED inactivation, aliquots of virus stock  
63 ( $150 \mu\text{l}$ ) were placed in the center of a 60-mm Petri dish and irradiated with  $3.75 \text{ mW/cm}^2$  at work  
64 distance 20 mm for a range of times ( $n=3$  each for 1, 10, 20, 30, or 60 s). Each virus stock irradiated  
65 with DUV-LED was serially diluted in 10-fold steps, then inoculated onto Vero monolayers in a

66 12-well plate. After adsorption of virus for 2 h, cells were overlaid with MEM containing 1%  
67 carboxymethyl cellulose and 2% FBS (final concentration). Cells were incubated for 72 h in a CO<sub>2</sub>  
68 incubator, then cytopathic effects were observed under a microscope. An unirradiated virus  
69 suspension was used as a negative control. To calculate PFU, cells were fixed with 10% formalin for  
70 30 min, followed by staining with 0.1% methylene blue solution. The antiviral effects of DUV-LED  
71 irradiations were assessed using the logPFU ratio, calculated as  $\log_{10}(\text{Nt}/\text{N0})$ , where  
72 Nt is the PFU count of the UV-irradiated sample, and N0 is the PFU count of the sample without UV  
73 irradiation. In addition, the infectious titer reduction rate was calculated as  $(1 - 1/10^{\log_{10} \text{PFU ratio}}) \times 100$   
74 (%). All experiments were performed in a BSL-3 laboratory.

75 We observed a marked cytopathic effect in virus-infected cells without DUV-LED irradiation  
76 (Figure 1A, see “0 s”). In contrast, virus-infected cells irradiated for 60 s showed largely comparable  
77 morphology to mock cells (Figure 1A, see “60 s”). To our surprise, virus-infected cells irradiated for  
78 1 s showed minimal change (Figure 1A, see “1 s”). The plaque assay (Figure 1B) revealed that short  
79 time DUV-LED irradiation rapidly inactivated SARS-CoV-2 (Figure 1C and Table S1). Of note, the  
80 infectious titer reduction rate of 87.4% was already recognized with irradiation of virus stock for 1 s,  
81 and the rate was 99.9% with irradiation for 10 s. These results suggest that DUV-LED drastically  
82 inactivated SARS-CoV-2 with irradiation for even a very short time.

83 UV-LEDs providing irradiation at various peak emission wavelengths, such as UV-A (320–400  
84 nm), UV-B (280–320 nm), and UV-C (100–280 nm), have been adopted to inactivate various  
85 pathogenic species, including bacteria, viruses and fungi. Devices equipped with UV-LEDs are now  
86 beginning to be introduced into medical fields. UV-C is considered to be the most effective  
87 germicidal region of the UV spectrum, acting through the formation of photoproducts in DNA [12].  
88 These pyrimidine dimers interrupt transcription, translation and replication of DNA, eventually  
89 leading to inactivation of microorganisms [13]. The efficacy of this inactivation may depend not  
90 only on the wavelength, but also on factors such as the target (e.g., bacterial species), light output  
91 and environmental conditions. The DUV-LED we used has the characteristics of a narrow-range  
92 wavelength and high power for short exposure times and long-term use. This study demonstrated for  
93 the first time the rapid inactivation of SARS-CoV-2 under DUV-LED irradiation. As shown in  
94 Figure 1B, cytopathic effects were observed in control Vero cells infected with SARS-Cov-2, but not  
95 in these cells with DUV-LED irradiation for only 10 s. As well as in community settings, healthcare  
96 settings are also vulnerable to the invasion and spread of SARS-CoV-2, and the stability of  
97 SARS-CoV-2 in aerosols and on surfaces [4] likely contributes to virus transmission in medical  
98 environments. No vaccines, neutralizing antibodies, or drugs are currently available for prevention  
99 and treatment of SARS-CoV-2. By revealing that SARS-Cov-2 inactivation can be achieved with  
100 very short-term DUV-LED irradiation, this study provides useful baseline data toward securing a  
101 safer medical environment. Development of devices equipped with DUV-LED is expected to prevent

102 the virus invasion through the air and after touching contaminated objects.

103

104

#### 105 **Contributors**

106 H.I. and H.S. conceived the study and wrote the manuscript. A.S. and T.O. conducted the  
107 experiments dealing with viruses. S.F. contributed to the study design, study supervision and  
108 manuscript revision.

109

#### 110 **Acknowledgements**

111 We wish to thank Drs. Tomohiko Takasaki and Jun-Ichi Sakuragi, from the Kanagawa Prefectural  
112 Institute of Public Health, for providing the SARS-CoV-2/Hu/DP/Kng/19-027 strain.

113

#### 114 **Declaration of interest statement**

115 H.S. receives part of his salary from Nikkiso Co., Ltd., Tokyo, Japan. Nikkiso supplied the deep  
116 ultraviolet light-emitting diode (DUV-LED) instrument for evaluation. Nikkiso had no role in study  
117 design, data collection and analysis, decision to publish, or preparation of the manuscript. The other  
118 authors declare no conflicts of interest.

119

#### 120 **Figure 1.** Inhibitory effects of DUV-irradiation on SARS-CoV-2.

121 (A) Cytopathic changes in virus-infected Vero cells without DUV-LED irradiation (0 s), or with  
122 DUV-LED irradiation for 1, 10, 20, 30 or 60 s.

123 (B) Plaque formation in Vero cells. Virus solutions irradiated with DUV-LED for several durations  
124 were diluted (100-fold) and inoculated to Vero cells. A representative result is shown.

125 (C) Time-dependent inactivation of SARS-CoV-2 by DUV-LED irradiation. The results shown are  
126 the mean and standard deviation (SD) of triplicate measurements. The dashed line indicates the limit  
127 of detection.

128

#### 129 **Table S1.** Differences in infectious titer with different DUV-LED irradiation times.

130

#### 131 **References**

- 132 1. [https://www.who.int/docs/default-source/coronaviruse/situation-reports/20200525-covid-19-sitre](https://www.who.int/docs/default-source/coronaviruse/situation-reports/20200525-covid-19-sitre-p-126.pdf?sfvrsn=887dbd66_2)  
133 [p-126.pdf?sfvrsn=887dbd66\\_2](https://www.who.int/docs/default-source/coronaviruse/situation-reports/20200525-covid-19-sitre-p-126.pdf?sfvrsn=887dbd66_2)
- 134 2. Wang W, Xu Y, Gao R, et al. Detection of SARS-CoV-2 in different types of clinical specimens.  
135 JAMA. 2020 May 12;323(18):1843–1844.
- 136 3. Sun J, Zhu A, Li H, et al. Isolation of infectious SARS-CoV-2 from urine of a COVID-19 patient.  
137 Emerging Microbes & Infections. 2020 May 18;9(1):991-993.

- 138 4. van Doremalen N, Bushmaker T, Morris DH, et al. Aerosol and surface stability of SARS-CoV-2  
139 as compared with SARS-CoV-1. *N Engl J Med*. Published online 2020 Mar 17.
- 140 5. Kampf G, Todt D, Pfaender S, et al. Persistence of coronaviruses on inanimate surfaces and their  
141 inactivation with biocidal agents. *J Hosp Infect*. 2020 Mar;104(3):246-251.
- 142 6. Kratzel A, Todt D, V'kovski P, et al. Inactivation of severe acute respiratory syndrome  
143 Coronavirus 2 by WHO-recommended hand rub formulations and alcohols. *Emerg Infect Dis*.  
144 Published online 2020 Apr 13.
- 145 7. Rattanakul S, Oguma K. Inactivation kinetics and efficiencies of UV-LEDs against  
146 *Pseudomonas aeruginosa*, *Legionella pneumophila*, and surrogate microorganisms. *Water Res*.  
147 2018 March 1;130:31–37.
- 148 8. Nishisaka-Nonaka R, Mawatari K, Yamamoto T, et al. Irradiation by ultraviolet light-emitting  
149 diodes inactivates influenza A viruses by inhibiting replication and transcription of viral RNA in  
150 host cells. *J Photochem Photobiol B. Biology* 2018 Dec;189:193-200.
- 151 9. Kim DK, Kang DH. UVC LED irradiation effectively inactivates aerosolized viruses, bacteria,  
152 and fungi in a chamber-type air disinfection system. *Appl Environ Microbiol*. 2018 Aug  
153 17;84(17): e00944-18.
- 154 10. Cheng Y, Chen H, Basurto LAS, et al. Inactivation of *Listeria* and *E. coli* by Deep-UV LED:  
155 effect of substrate conditions on inactivation kinetics. *Sci Rep*. 2020 Feb 25;10:3411.
- 156 11. Mallapaty S. What the cruise-ship outbreaks reveal about COVID-19. *Nature*. 2020  
157 April;580(7801):18.
- 158 12. Bintsis T, Litopoulou-Tzanetaki E, Robinson RK. Existing and potential applications of  
159 ultraviolet light in the food industry – a critical review. *J Sci Food Agric*. 2000 April  
160 27;80:637-645.
- 161 13. Kim SJ, Kim DK, Kang DH. Using UVC light-emitting diodes at wavelengths of 266 to 279  
162 nanometers to inactivate foodborne pathogens and pasteurize sliced cheese. *Appl Environ*  
163 *Microbiol*. 2016 Jan 1;82(1): 11-17.

**Figure 1**

**A**

**Mock**

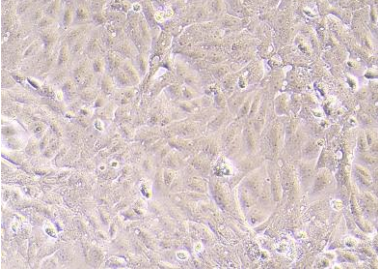

**0 s**

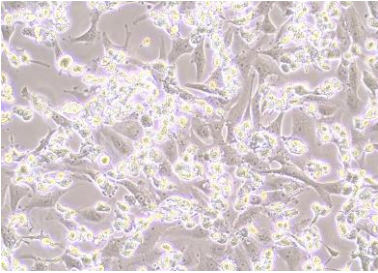

**1 s**

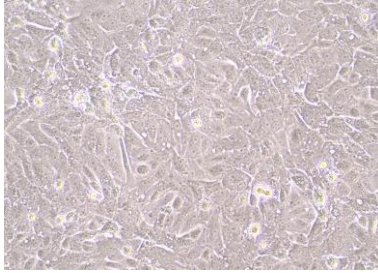

**10 s**

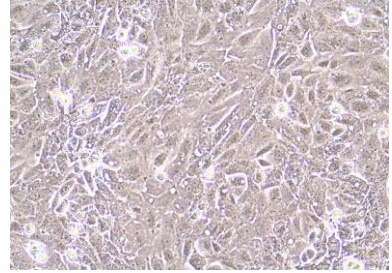

**20 s**

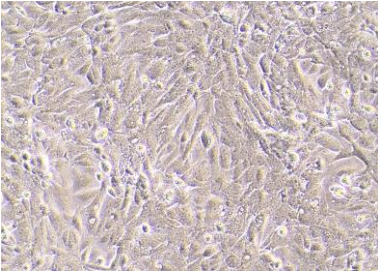

**30 s**

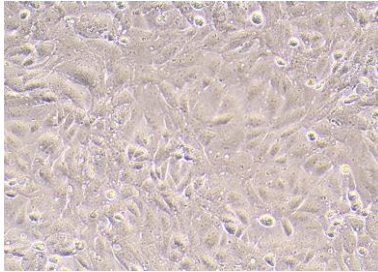

**60 s**

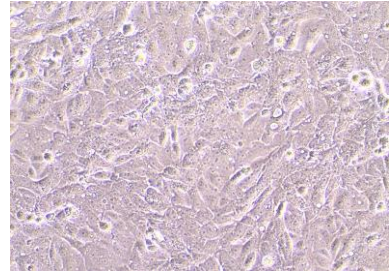

**Figure 1**

**B**

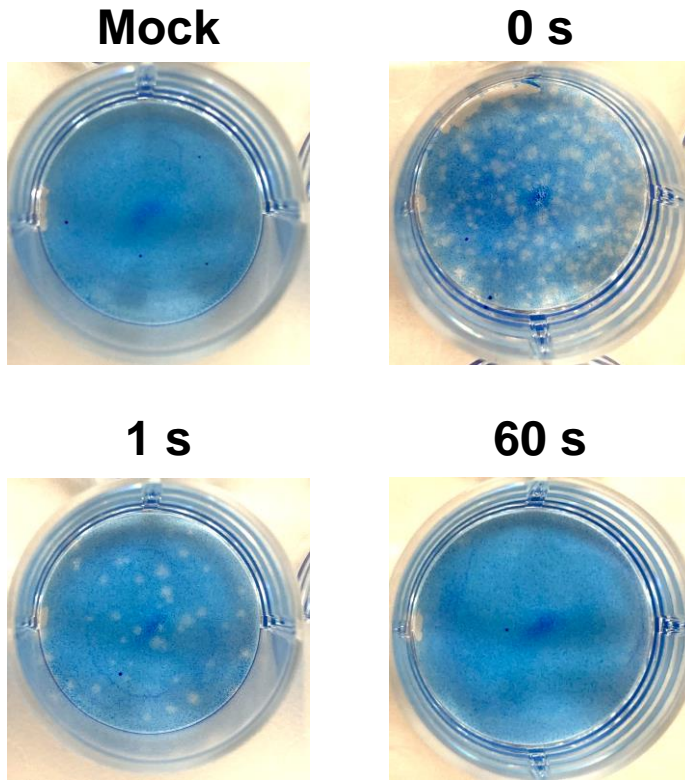

**C**

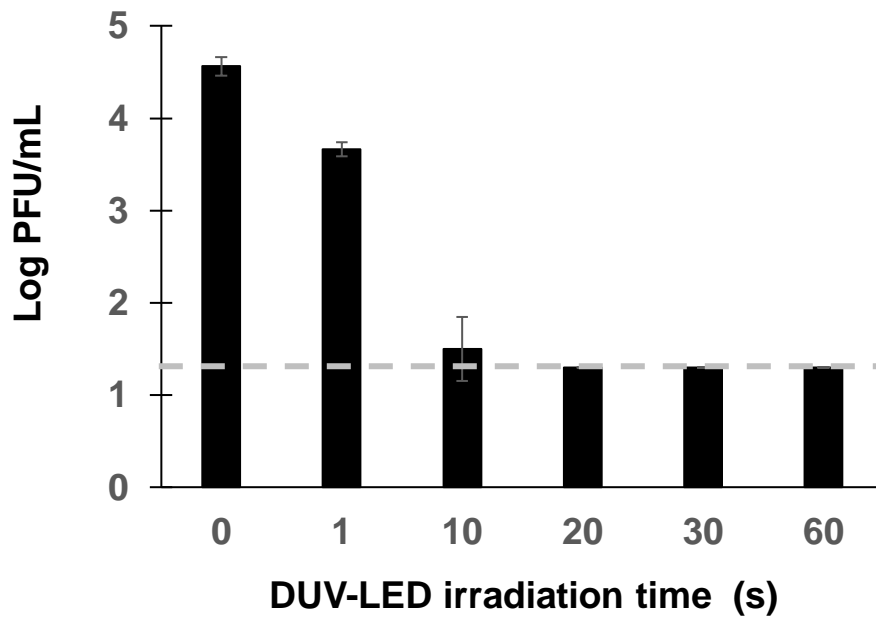

## Supplement Table 1

Differences in infectious titer with different DUV-LED irradiation times.

| Irradiation time                                  | control<br>(no irradiation) | DUV-LED irradiation time |                   |                   |        |        |
|---------------------------------------------------|-----------------------------|--------------------------|-------------------|-------------------|--------|--------|
|                                                   |                             | 1 sec                    | 10 sec            | 20 sec            | 30 sec | 60 sec |
| PFU(PFU/mL)                                       | $3.7 \times 10^4$           | $4.7 \times 10^3$        | $2.7 \times 10^1$ | $6.7 \times 10^0$ | <20    | <20    |
| Log PFU ratio <sup>1)</sup>                       | —                           | 0.9                      | 3.1               | >3.3              | >3.3   | >3.3   |
| Infection titer reduction ratio <sup>2)</sup> (%) | —                           | 87.4                     | 99.9              | >99.9             | >99.9  | >99.9  |

<sup>1)</sup>  $\log_{10} (N_t/N_0)$ , where  $N_t$  is the PFU count of the UV-irradiated sample, and  $N_0$  is the PFU count of the sample without UV irradiation. <sup>2)</sup>  $(1 - 1/10^{\log \text{PFU ratio}}) \times 100$  (%).
